# Supplementary material
Source: PubMed Central journal article supplement (PMC1733856)
Supplement: jmedeth_30_3_311__2.pdf [file jmedeth_30_3_311__2.pdf]

## Appendix II

### **Patient information regarding cardiopulmonary resuscitation**

Cardiopulmonary resuscitation (CPR) is not an easy subject to talk about, but it is important that you should know all that you can so that you can make an informed decision about the treatment you would or would not like to receive should your heart and breathing suddenly stop. The term for this is cardiac arrest.

The staff can give you a short booklet to read that will provide information that will help you to come to a decision about whether you would wish to be resuscitated or not. It is not a substitute for a discussion with those involved in your care but will serve as another source of information for you about resuscitation. If you wish to speak to your Doctor about Resuscitation please ask the staff to arrange this.

If you wish to read a copy of the booklet please ask the staff for a copy.

The booklet is available in the following format:

- Large Print
